# Supplementary material for: HOTSSea v1: a NEMO-based physical Hindcast of the Salish Sea (1980–2018) supporting ecosystem model development
Source: Copernicus journal article supplement (doi:10.5194/gmd-18-211-2025), 2025-01-20
Supplement: Supplementary file 1 [file gmd-18-211-2025-supplement.pdf]

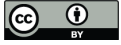

*Supplement of*

## **HOTSSea v1: a NEMO-based physical Hindcast of the Salish Sea (1980–2018) supporting ecosystem model development**

**Greig Oldford et al.**

*Correspondence to:* Greig Oldford ([greig.oldford@dfo-mpo.gc.ca](mailto:greig.oldford@dfo-mpo.gc.ca))

The copyright of individual parts of the supplement might differ from the article licence.

# Supplemental

## S.1. - Supplemental Tables

**Table S1:** Metrics from evaluation of temperature for the hindcast (v1.01 - no temperature bias correction; v1.02 with temperature bias correction), grouped by subdomain and depths.

| Sub-domain | Depths (z) | N obs. | Temperature: HOTSSea v1.01 |       |      |      |      | Temperature: HOTSSea v1.02 |       |      |      |      |
|------------|------------|--------|----------------------------|-------|------|------|------|----------------------------|-------|------|------|------|
|            |            |        | Model Mean                 | Bias  | RMSE | R    | WSS  | Model Mean                 | Bias  | RMSE | R    | WSS  |
| <b>DI</b>  | all z      | 3649   | 10.06                      | 0.2   | 0.68 | 0.89 | 0.93 | 9.74                       | -0.06 | 0.63 | 0.88 | 0.93 |
|            | 0->30 m    | 3640   | 10.48                      | 0.03  | 0.84 | 0.9  | 0.95 | 10.24                      | -0.17 | 0.85 | 0.9  | 0.94 |
|            | 30->150 m  | 3083   | 9.72                       | 0.25  | 0.51 | 0.87 | 0.9  | 9.41                       | -0.06 | 0.45 | 0.88 | 0.92 |
|            | >150 m     | 1118   | 9.74                       | 0.45  | 0.55 | 0.79 | 0.75 | 9.34                       | 0.04  | 0.33 | 0.76 | 0.86 |
| <b>SGN</b> | all z      | 12365  | 9.73                       | 0.24  | 0.47 | 0.93 | 0.95 | 9.4                        | -0.08 | 0.37 | 0.94 | 0.97 |
|            | 0->30 m    | 12349  | 10.36                      | -0.17 | 0.63 | 0.95 | 0.98 | 10.13                      | -0.39 | 0.7  | 0.96 | 0.97 |
|            | 30->150 m  | 11409  | 9.26                       | 0.16  | 0.33 | 0.89 | 0.92 | 8.95                       | -0.14 | 0.32 | 0.9  | 0.92 |
|            | >150 m     | 8348   | 9.64                       | 0.52  | 0.59 | 0.8  | 0.66 | 9.25                       | 0.13  | 0.31 | 0.77 | 0.83 |
| <b>SGS</b> | all z      | 4140   | 9.79                       | 0.21  | 0.56 | 0.95 | 0.97 | 9.42                       | -0.14 | 0.42 | 0.95 | 0.97 |
|            | 0->30 m    | 4138   | 10.36                      | 0.06  | 0.69 | 0.95 | 0.97 | 10.08                      | -0.25 | 0.65 | 0.95 | 0.97 |
|            | 30->150 m  | 3437   | 9.47                       | 0.22  | 0.4  | 0.94 | 0.95 | 9.13                       | -0.13 | 0.32 | 0.94 | 0.96 |
|            | >150 m     | 1136   | 9.61                       | 0.48  | 0.57 | 0.86 | 0.79 | 9.21                       | 0.08  | 0.31 | 0.85 | 0.91 |
| <b>GI</b>  | all z      | 2512   | 10.61                      | 0.34  | 0.87 | 0.93 | 0.95 | 10.27                      | 0.04  | 0.7  | 0.94 | 0.96 |
|            | 0->30 m    | 2512   | 11.09                      | 0.36  | 0.89 | 0.94 | 0.95 | 10.77                      | 0.07  | 0.73 | 0.94 | 0.97 |
|            | 30->150 m  | 1832   | 10.01                      | 0.41  | 0.8  | 0.92 | 0.9  | 9.68                       | 0.08  | 0.6  | 0.93 | 0.94 |
|            | >150 m     | 175    | 9.26                       | 0.61  | 0.84 | 0.7  | 0.73 | 8.78                       | 0.13  | 0.38 | 0.86 | 0.92 |
| <b>HS</b>  | all z      | 800    | 10.45                      | 0.65  | 0.88 | 0.96 | 0.93 | 10.01                      | 0.2   | 0.59 | 0.97 | 0.97 |
|            | 0->30 m    | 800    | 10.96                      | 0.71  | 0.95 | 0.96 | 0.92 | 10.58                      | 0.33  | 0.66 | 0.97 | 0.96 |
|            | 30->150 m  | 610    | 9.63                       | 0.45  | 0.66 | 0.84 | 0.84 | 9.13                       | -0.05 | 0.37 | 0.87 | 0.93 |
|            | >150 m     | 442    | 9.22                       | 0.59  | 0.79 | 0.67 | 0.68 | 8.69                       | 0.06  | 0.35 | 0.83 | 0.9  |
| <b>JFS</b> | all z      | 3707   | 9.29                       | 0.66  | 0.92 | 0.74 | 0.75 | 8.74                       | 0.12  | 0.47 | 0.85 | 0.91 |
|            | 0->30 m    | 3707   | 10.38                      | 0.79  | 1.18 | 0.79 | 0.77 | 9.9                        | 0.31  | 0.79 | 0.81 | 0.87 |
|            | 30->150 m  | 3521   | 8.91                       | 0.59  | 0.84 | 0.69 | 0.72 | 8.35                       | 0.03  | 0.43 | 0.84 | 0.91 |
|            | >150 m     | 448    | 8.06                       | 0.98  | 1.16 | 0.36 | 0.47 | 7.37                       | 0.29  | 0.52 | 0.72 | 0.79 |
| <b>PS</b>  | all z      | 99     | 11.12                      | -0.1  | 0.8  | 0.89 | 0.94 | 10.81                      | -0.41 | 0.91 | 0.89 | 0.92 |
|            | 0->30 m    | 99     | 11.62                      | 0.04  | 0.73 | 0.92 | 0.96 | 11.32                      | -0.25 | 0.77 | 0.92 | 0.95 |
|            | 30->150 m  | 88     | 10.69                      | -0.25 | 0.94 | 0.85 | 0.91 | 10.36                      | -0.57 | 1.09 | 0.84 | 0.88 |
|            | >150 m     | 3      | 11.66                      | -0.15 | 0.43 | 0.6  | 0.71 | 11.18                      | -0.63 | 0.75 | 0.57 | 0.55 |

**Table S2:** Metrics from evaluation of salinity for the hindcast (v1.01 – no temperature bias correction; v1.02 - temperature bias correction) over the hindcast period (1980 – 2018), grouped by subdomain and depths.

| Sub-domain | Depths (z) | N obs. | Salinity: HOTSSea v1.01 |       |      |      |      | Salinity: HOTSSea v1.02 |       |      |      |      |
|------------|------------|--------|-------------------------|-------|------|------|------|-------------------------|-------|------|------|------|
|            |            |        | Model Mean              | Bias  | RMSE | R    | WSS  | Model Mean              | Bias  | RMSE | R    | WSS  |
| <b>DI</b>  | all z      | 3474   | 29.11                   | -0.19 | 1.06 | 0.72 | 0.79 | 29.28                   | -0.09 | 1.03 | 0.68 | 0.75 |
|            | 0->30 m    | 3465   | 27.75                   | -0.56 | 1.18 | 0.46 | 0.64 | 27.87                   | -0.48 | 1.14 | 0.4  | 0.61 |
|            | 30->150 m  | 3062   | 29.91                   | 0.2   | 0.84 | 0.65 | 0.67 | 29.96                   | 0.25  | 0.85 | 0.66 | 0.67 |
|            | >150 m     | 1118   | 30.82                   | 0.22  | 0.43 | 0.81 | 0.7  | 30.87                   | 0.26  | 0.46 | 0.81 | 0.68 |
| <b>SGN</b> | all z      | 12288  | 30.25                   | 0.29  | 0.49 | 0.92 | 0.94 | 30.33                   | 0.34  | 0.49 | 0.93 | 0.93 |
|            | 0->30 m    | 12272  | 28.3                    | 0.03  | 0.69 | 0.71 | 0.83 | 28.38                   | 0.09  | 0.67 | 0.72 | 0.83 |
|            | 30->150 m  | 11388  | 30.5                    | 0.41  | 0.48 | 0.77 | 0.66 | 30.56                   | 0.47  | 0.52 | 0.79 | 0.62 |
|            | >150 m     | 8347   | 31.2                    | 0.26  | 0.3  | 0.63 | 0.57 | 31.25                   | 0.3   | 0.34 | 0.64 | 0.52 |
| <b>SGS</b> | all z      | 3834   | 28.57                   | 0     | 2.73 | 0.89 | 0.93 | 29.23                   | 0.38  | 1.45 | 0.96 | 0.98 |
|            | 0->30 m    | 3832   | 27.29                   | 0.05  | 2.8  | 0.86 | 0.91 | 27.84                   | 0.44  | 1.6  | 0.95 | 0.97 |
|            | 30->150 m  | 3437   | 30.56                   | 0.46  | 0.5  | 0.86 | 0.69 | 30.61                   | 0.51  | 0.55 | 0.86 | 0.65 |
|            | >150 m     | 1136   | 31.21                   | 0.32  | 0.35 | 0.85 | 0.71 | 31.26                   | 0.37  | 0.39 | 0.86 | 0.66 |
| <b>GI</b>  | all z      | 2473   | 29.02                   | -0.58 | 1.21 | 0.67 | 0.77 | 29.1                    | -0.53 | 1.18 | 0.66 | 0.76 |
|            | 0->30 m    | 2473   | 28.44                   | -0.65 | 1.27 | 0.56 | 0.67 | 28.51                   | -0.6  | 1.25 | 0.56 | 0.67 |
|            | 30->150 m  | 1832   | 29.79                   | -0.46 | 0.78 | 0.76 | 0.79 | 29.84                   | -0.41 | 0.75 | 0.77 | 0.8  |
|            | >150 m     | 175    | 31.54                   | -0.14 | 0.49 | 0.91 | 0.93 | 31.57                   | -0.1  | 0.48 | 0.91 | 0.93 |
| <b>HS</b>  | all z      | 800    | 30.49                   | -0.2  | 0.69 | 0.94 | 0.93 | 30.54                   | -0.16 | 0.67 | 0.94 | 0.93 |
|            | 0->30 m    | 800    | 29.6                    | -0.47 | 0.81 | 0.87 | 0.85 | 29.64                   | -0.43 | 0.78 | 0.87 | 0.86 |
|            | 30->150 m  | 610    | 31.32                   | 0.15  | 0.41 | 0.71 | 0.82 | 31.37                   | 0.2   | 0.43 | 0.71 | 0.81 |
|            | >150 m     | 442    | 31.99                   | 0.1   | 0.35 | 0.83 | 0.9  | 32.03                   | 0.14  | 0.36 | 0.84 | 0.9  |
| <b>JFS</b> | all z      | 3675   | 32.18                   | -0.02 | 0.51 | 0.82 | 0.9  | 32.23                   | 0.02  | 0.48 | 0.83 | 0.91 |
|            | 0->30 m    | 3675   | 30.73                   | -0.52 | 0.93 | 0.42 | 0.59 | 30.79                   | -0.46 | 0.88 | 0.41 | 0.6  |
|            | 30->150 m  | 3514   | 32.7                    | 0.19  | 0.43 | 0.87 | 0.92 | 32.73                   | 0.22  | 0.45 | 0.87 | 0.91 |
|            | >150 m     | 448    | 33.83                   | 0.07  | 0.21 | 0.78 | 0.86 | 33.84                   | 0.07  | 0.21 | 0.78 | 0.86 |
| <b>PS</b>  | all z      | 99     | 29.7                    | -0.15 | 0.9  | 0.55 | 0.69 | 29.77                   | -0.08 | 0.88 | 0.56 | 0.7  |
|            | 0->30 m    | 99     | 29.11                   | -0.48 | 1.04 | 0.43 | 0.59 | 29.18                   | -0.4  | 0.99 | 0.45 | 0.61 |
|            | 30->150 m  | 88     | 30.13                   | 0.05  | 0.73 | 0.61 | 0.73 | 30.2                    | 0.12  | 0.72 | 0.62 | 0.74 |
|            | >150 m     | 3      | 30.88                   | 0.19  | 0.24 | 1    | 0.86 | 30.96                   | 0.28  | 0.3  | 1    | 0.79 |

## S.2. – Supplemental Figures

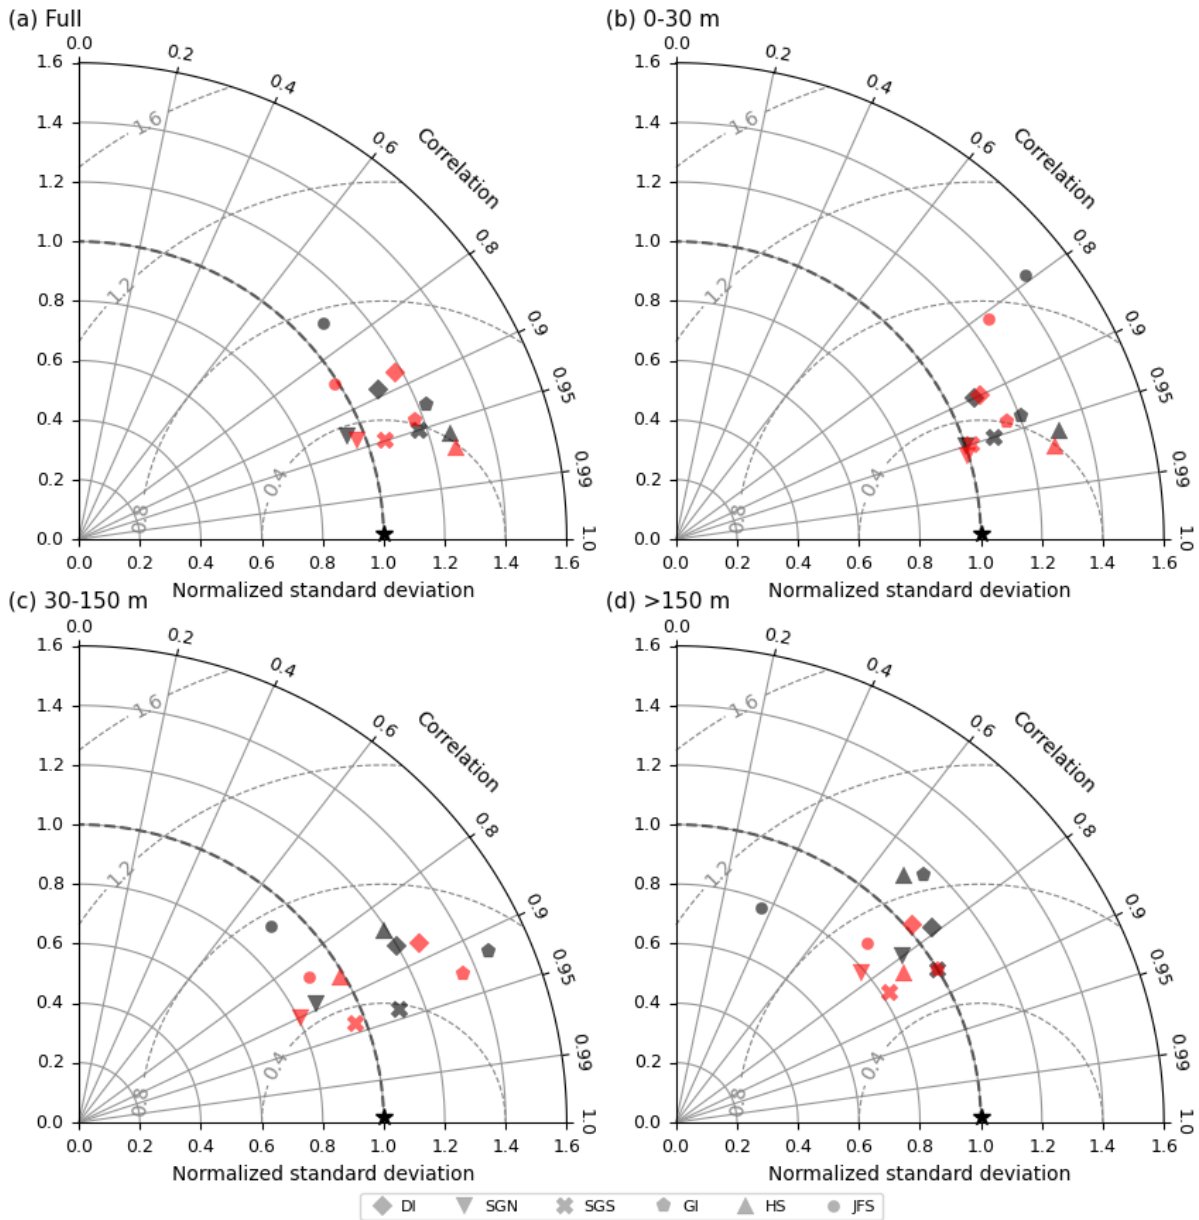

**Figure S1:** Taylor plots of temperature using CTD measurements grouped by subdomain and illustrating change in model performance after applying temperature bias correction at open boundary (grey = HOTSSea v1.01; before bias correction, red = HOTSSea v1.02; after bias correction). Standard deviation (solid grey contours) and centred root mean square error (dashed grey contours) have been normalised.

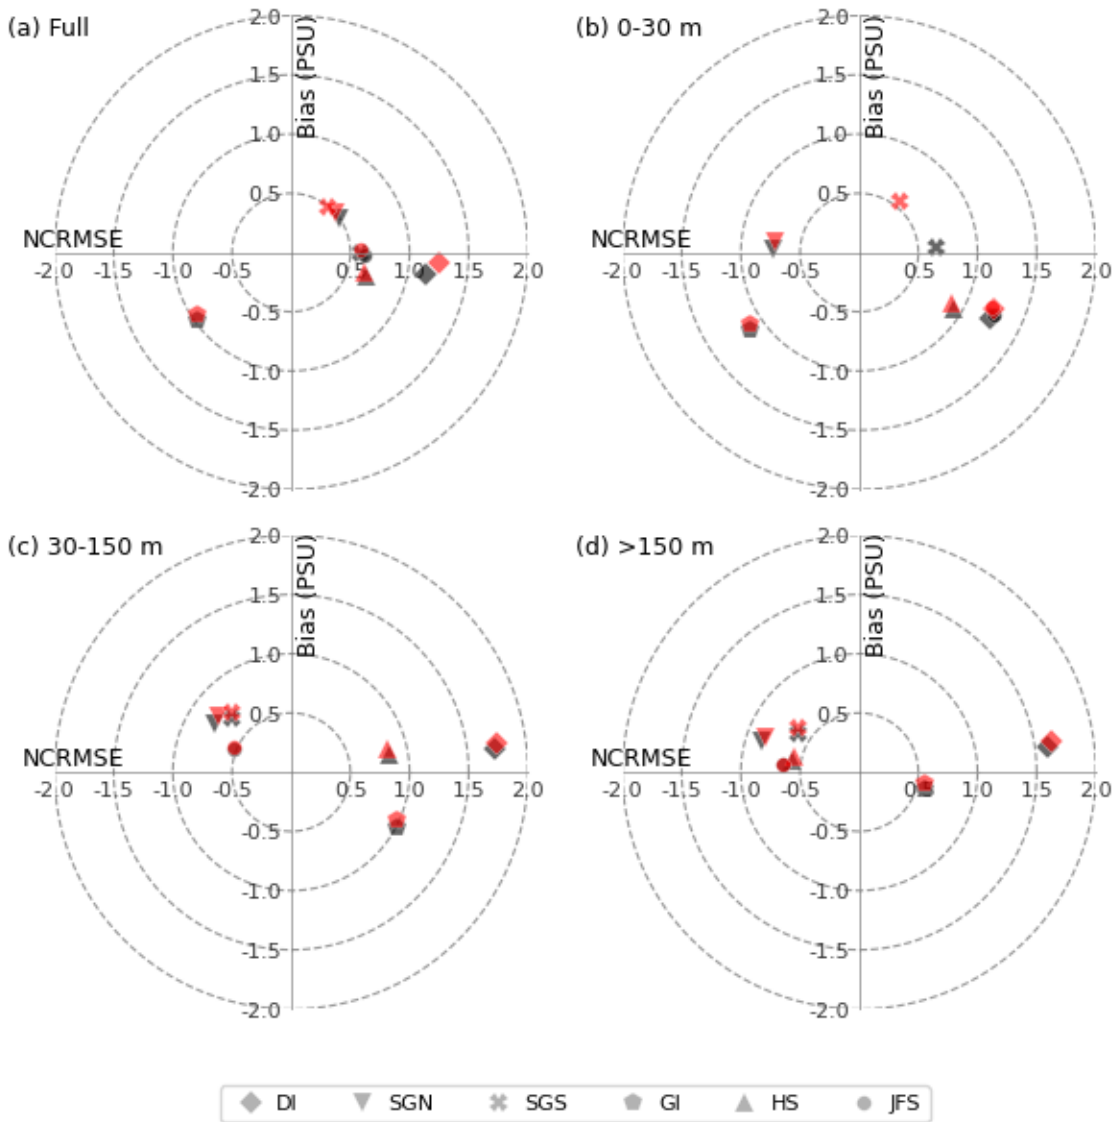

**Figure S2:** Target plots of the model's salinity bias and normalised centred root mean squared error (NCRMSE) using CTD data grouped by depth strata (panels a - d) and by subdomain. Results without bias correction to western open ocean boundary conditions (HOTSSea v1.01) are shown in grey and results with temperature bias correction (HOTSSea v1.02) are shown in red.

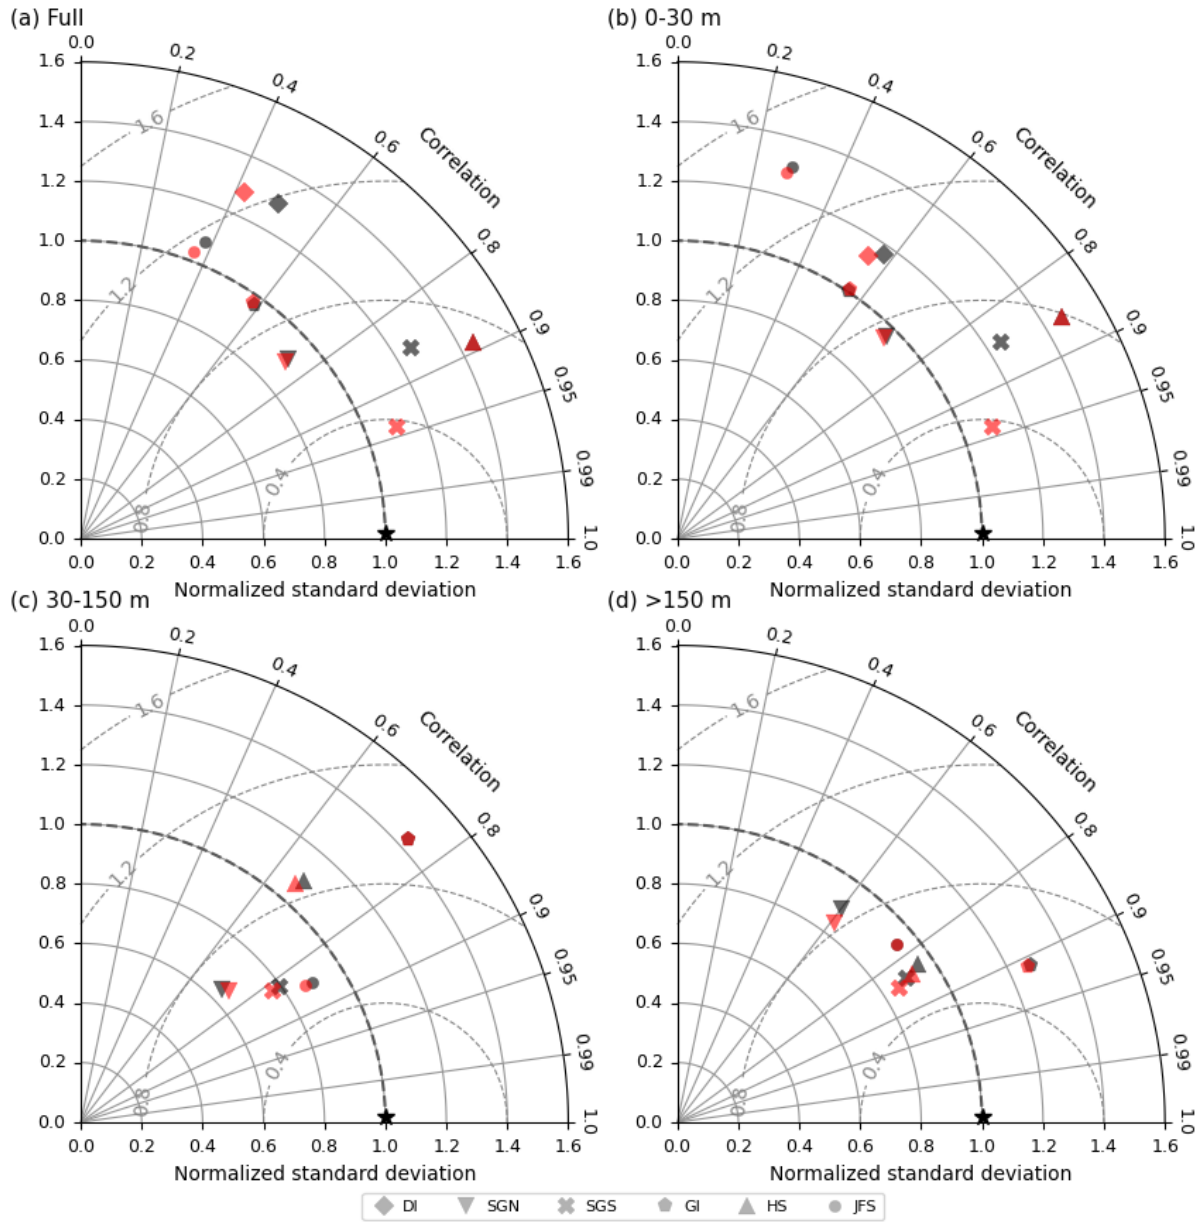

**Figure S3:** Taylor diagrams showing salinity (PSU) using CTD measurement grouped by depth and subdomain. Plots show minor differences in temperature bias correction at open boundary before bias correction (grey = HOTSSea v1.01) versus after bias correction (red = HOTSSea v1.02). Standard deviation (solid grey contours) and centred root mean square error (dashed grey contours) have been normalised.

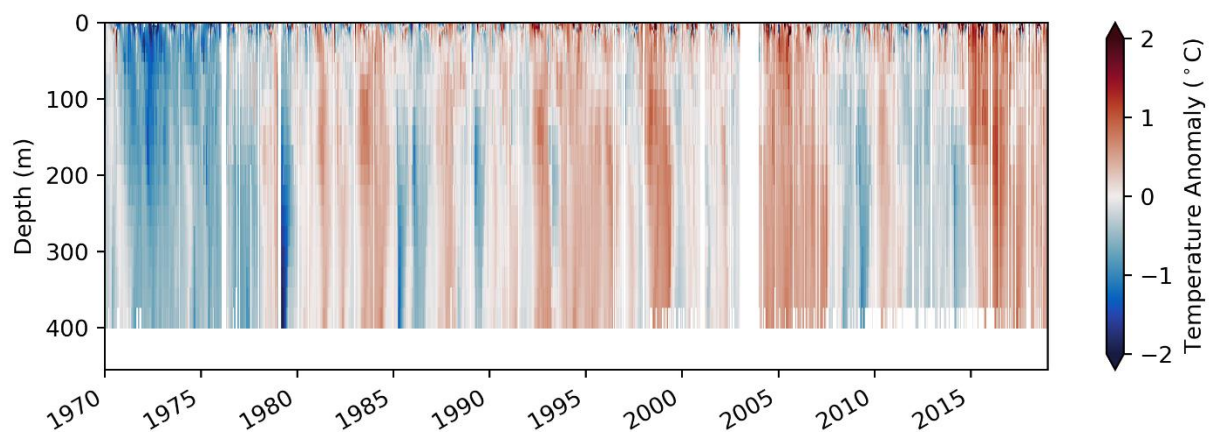

**Figure S4:** Water temperature anomalies from observations taken at Nanoose station from 1970 to present illustrating the cold 1970 – 1979 period not covered by the model hindcast.
